# Supplementary material
Source: PubMed Central journal article supplement (PMC5830923)
Supplement: EMBJ-37-e97673-s001.pdf [file EMBJ-37-e97673-s001.pdf]

**Appendix – table of contents:**

|                                                      |           |
|------------------------------------------------------|-----------|
| Appendix Figure 1                                    | Page 2    |
| Appendix Antibody table                              | Page 3    |
| Appendix Materials and Methods- Supplemental section | Pages 4-5 |
| Appendix References                                  | Page 6    |

Supplementary Material

Appendix Figure 1

Appendix Fig.1

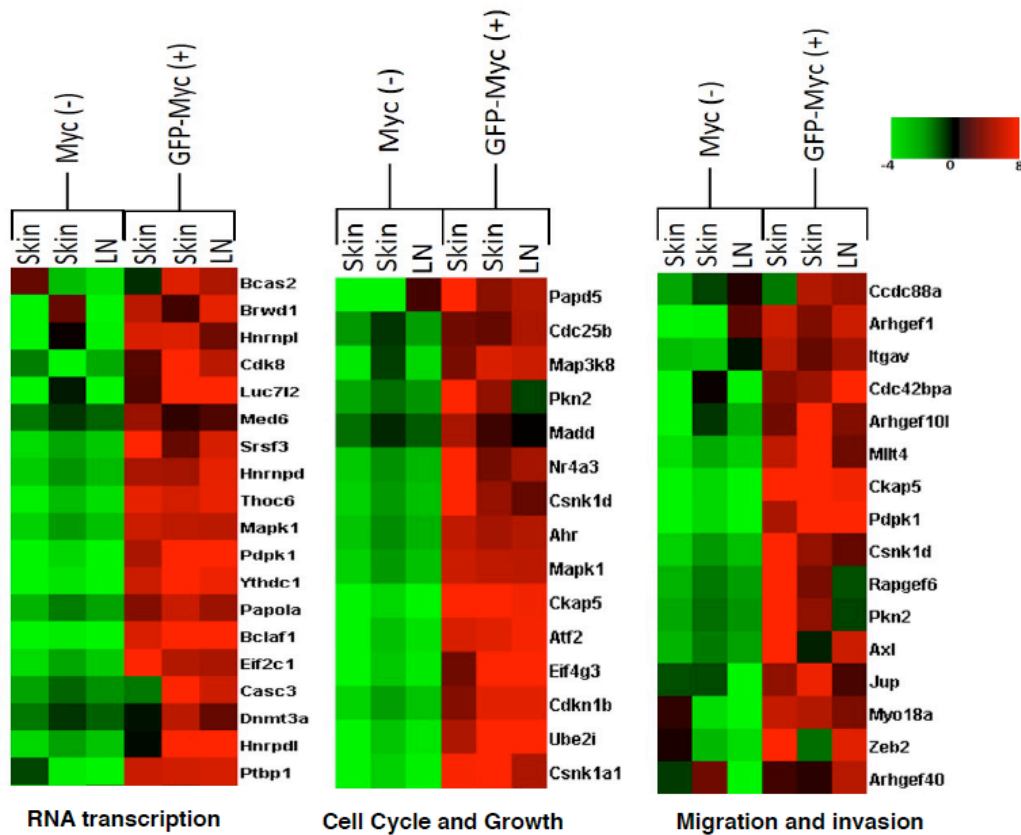

**Appendix Figure1: c-Myc expression in Tyr::Nras<sup>Q61K</sup>INK4a<sup>-/-</sup> melanoma cells induces expression of RNA transcription, growth and migration classes of genes .**

Heatmaps of RNA expression patterns comparing changes between GFP-cMyc(+) and GFP-c-Myc(-) cells indicating major alterations in RNA transcription, cell cycle and growth, migration and invasion pathways. Relative expression levels are color coded as indicated (green low expression – red high expression).

## Appendix Table S1: Antibodies used

| Antibody                           | Catalog number | Supplier                  | Application    | Fluorochrome |
|------------------------------------|----------------|---------------------------|----------------|--------------|
| c-Myc (Y69)                        | ab32072        | Abcam                     | WB, IH         | NA           |
| c-Myc                              | ab11917        | Abcam                     | WB             | NA           |
| PDK1                               | # 3062         | Cell Signaling Technology | WB             | NA           |
| AMPK $\beta$ 2                     | # 4148         | Cell Signaling Technology | WB             | NA           |
| AMPK $\beta$ 1/2                   | # 4150         | Cell Signaling Technology | WB             | NA           |
| Total Acetyl CoA carboxylase (ACC) | #3676          | Cell Signaling Technology | WB             | NA           |
| phospho-ACC1 (Ser79)               | #3661          | Cell Signaling Technology | WB             | NA           |
| total Raptor                       | #2280          | Cell Signaling Technology | WB             | NA           |
| phospho-Raptor (Ser792)            | #2083          | Cell Signaling Technology | WB             | NA           |
| total AMPK $\alpha$                | #2532          | Cell Signaling Technology | WB             | NA           |
| phospho-AMPK $\alpha$ (Thr 172)    | #2535          | Cell Signaling Technology | WB             | NA           |
| phospho-ULK1 (Ser555)              | #5869          | Cell Signaling Technology | WB             | NA           |
| AMPK $\alpha$ 1                    | 07-350         | Merck                     | WB             | NA           |
| AMPK $\alpha$ 2                    | 07-363         | Merck                     | WB             | NA           |
| AMPK $\gamma$ 2                    | sc-19141       | Santa Cruz                | WB             | NA           |
| AMPK $\gamma$ 1                    | NA             | Dr Kei sakamoto lab       | WB             | NA           |
| Actin                              | #A5441         | Sigma                     | WB             | NA           |
| $\alpha$ -tubulin                  | #T6074         | Sigma                     | WB             | NA           |
| CD45                               | 17-0451-83     | ebioscience               | Flow cytometry | APC          |
| CD31                               | 17-0311-82     | ebioscience               | Flow cytometry | APC          |
| CD271                              | ab534          | Abcam                     | Flow cytometry | NA           |
| anti-rabbit secondary antibody     | 711-175-152    | Jackson Immunoresearch    | Flow cytometry | PE-Cy5       |

Abbreviations: WB – Western blot; IH – Immunohistochemistry; NA – non applicable

### **Materials & Methods – Supplemental Section:**

**Flow cytometry neural crest stem cell marker CD271.** Single cell melanocyte suspensions ( $5 \times 10^5$  to  $1 \times 10^6$  cells) were resuspended in SM and stained with the following antibodies:  $\alpha$ -CD45APC (eBioscience) and  $\alpha$ -CD31APC (eBioscience). CD271 staining was performed as follows. Cells were in addition with  $\alpha$ -CD271 antibody (Abcam) or normal rabbit serum (Invitrogen) followed by  $\alpha$ -rabbit PE-Cy5 secondary antibody (Jackson ImmunoResearch) for fluorescence detection. Dead cells were excluded using DAPI (Roche). GFP<sup>+/-</sup> and/or GFP<sup>+/-</sup>/CD271<sup>+/-</sup> expression was analyzed on a Dako CyAn Flow Cytometer gated on CD45<sup>-</sup> CD31<sup>-</sup> DAPI<sup>-</sup> cells. Primary skin tumors from Tyr::NRAS<sup>Q61K</sup>INK4a<sup>-/-</sup> mice were used as a negative control. Data was processed using FlowJo<sup>®</sup> software. The same staining protocol was used for sorting of GFP<sup>+/-</sup> and/or GFP<sup>+/-</sup>/CD271<sup>+/-</sup> cells using a BC MoFlo Astrios<sup>EQ</sup> cell sorter. Purity of GFP<sup>+</sup> and GFP<sup>-</sup> live cell populations (CD31<sup>-</sup>CD45<sup>-</sup>DAPI<sup>-</sup>) were greater than 90%.

**RNA-seq.** RNA-seq data was mapped (Langmead and Salzberg 2012), mouse genome mm10) and analyzed using the mapping and the RNA-seq modules of HTSstation (<http://htsstation.vital-it.ch/>). Counts preprocessing and differential analysis was done with the R packages *limma* (Smyth 2004) and *voom* (Law et al. 2014). Genes with an adjusted p-value (Benjamini and Y. 1995) lower than 0.05 and an absolute log<sub>2</sub> Fold-change greater than 1.5 were called differentially expressed.

### **Adenine nucleotide measurement**

Sample preparation for adenine nucleotide analysis was based on (Gheldof et al. 2017). In brief, intracellular contents were extracted with hot 75% (v/v) methanol/ultrapure water and supernatants were evaporated to dryness. Samples were reconstituted in 100  $\mu$ L of a solution of acetonitrile:water 60:40 (v/v). After 20 min centrifugation, 10  $\mu$ L were transferred to glass vials for hydrophilic interaction ultra high performance liquid chromatography mass spectrometry (UHPLC-MS) analysis (Pluskal et al. 2010), and 5  $\mu$ L were injected into the system. The UHPLC

consisted of a binary pump, a cooled autosampler, and a column oven (Vanquish UHPLC+ Focused, Thermo Scientific), connected to an orbitrap mass spectrometer (Orbitrap Fusion Lumos Tribrid, Thermo Scientific) equipped with a heated electrospray (H-ESI) source. Samples were injected into a HILIC analytical column (2.1 mm x 100 mm, 5  $\mu$ m pore size, Merck SeQuant® ZIC®-pHILIC), guarded by a pre-column (2.1 mm x 20 mm, Merck SeQuant® ZIC®-pHILIC Guard Kit) operating at 35 °C. The mobile phase (10 mM ammonium acetate with 0.04% ammonium hydroxide, A, and acetonitrile, B) was pumped at 0.2 mL/min flow rate over a linear gradient of decreasing organic solvent (0.5-16 min, 90-25% B), followed by re-equilibration for a total running time of 30 min. On-the-fly alternating negative (3 kV) and positive (3.5 kV) ion modes was used for ionization and the following source parameters were applied: 20 sheath gas, 15 aux gas, ion transfer tube temperature 310 °C, vaporizer temperature 280 °C. MS acquisition was performed at 60000 orbitrap resolution, in centroid mode, by scanning between the mass range 85 to 850 Da. The software Xcalibur v4.1.31.9 (Thermo Scientific) was used for instrument control, data acquisition and processing. Positive ion mode extracted chromatograms using the corresponding accurate mass of AMP, ADP and ATP were integrated and used for relative comparison. Retention time and mass detection was confirmed by authentic standards.

## References

- Benjamini Y, Y. H. 1995. Controlling the false discovery rate: a practical and powerful approach to multiple testing. *Journal of the Royal Statistical Society B* **57**: 289-300.
- Gheldof N, Moco S, Chabert C, Teav T, Barron D, Hager J. 2017. Role of sulfotransferases in resveratrol metabolism in human adipocytes. *Molecular nutrition & food research* **61**.
- Langmead B, Salzberg SL. 2012. Fast gapped-read alignment with Bowtie 2. *Nature methods* **9**: 357-359.
- Law CW, Chen Y, Shi W, Smyth GK. 2014. voom: Precision weights unlock linear model analysis tools for RNA-seq read counts. *Genome biology* **15**: R29.
- Pluskal T, Nakamura T, Villar-Briones A, Yanagida M. 2010. Metabolic profiling of the fission yeast *S. pombe*: quantification of compounds under different temperatures and genetic perturbation. *Molecular bioSystems* **6**: 182-198.
- Smyth GK. 2004. Linear models and empirical bayes methods for assessing differential expression in microarray experiments. *Statistical applications in genetics and molecular biology* **3**: Article3.
