# Supplementary material
Source: PubMed Central journal article supplement (PMC5830923)

E)

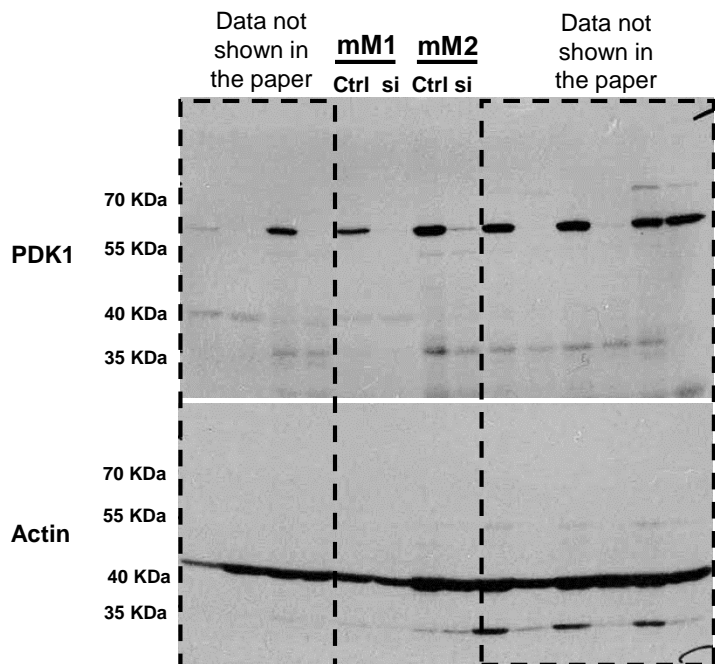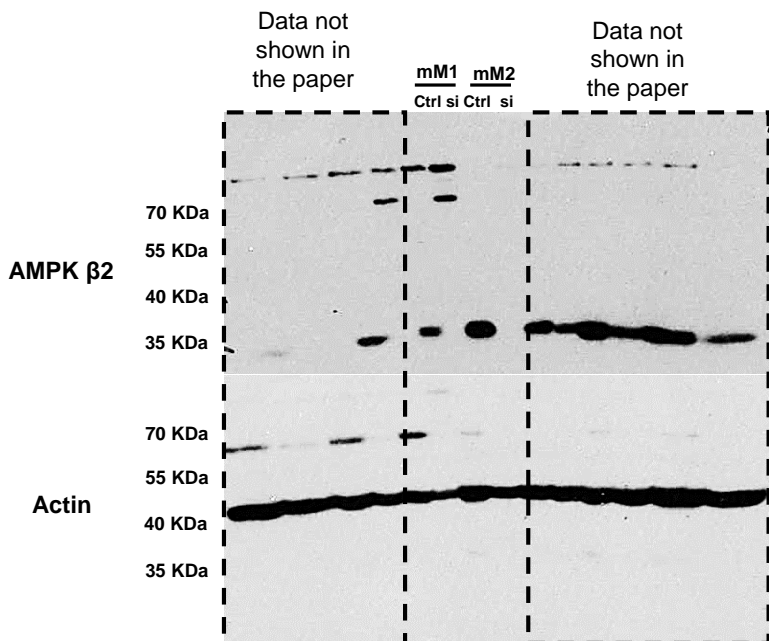

Supplement: EMBJ-37-e97673-s003.pdf [file EMBJ-37-e97673-s003.pdf]

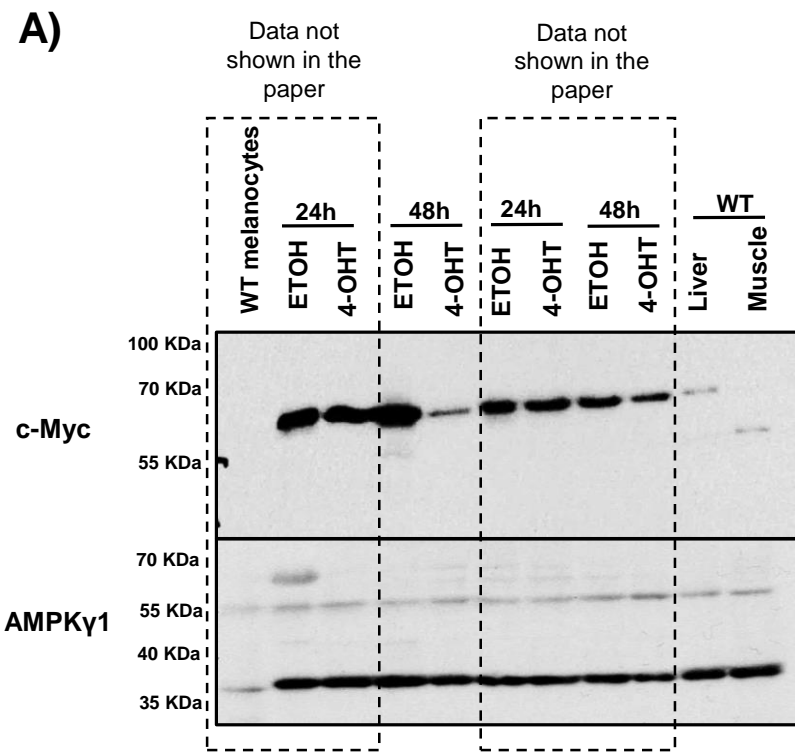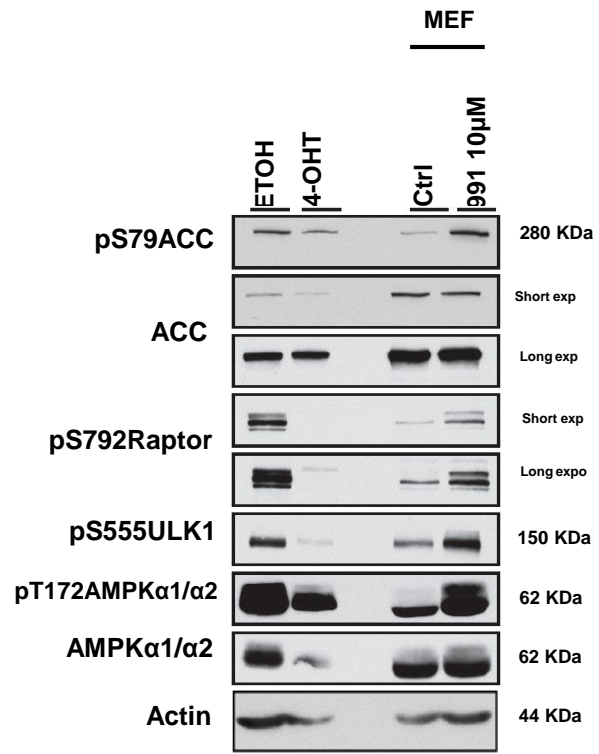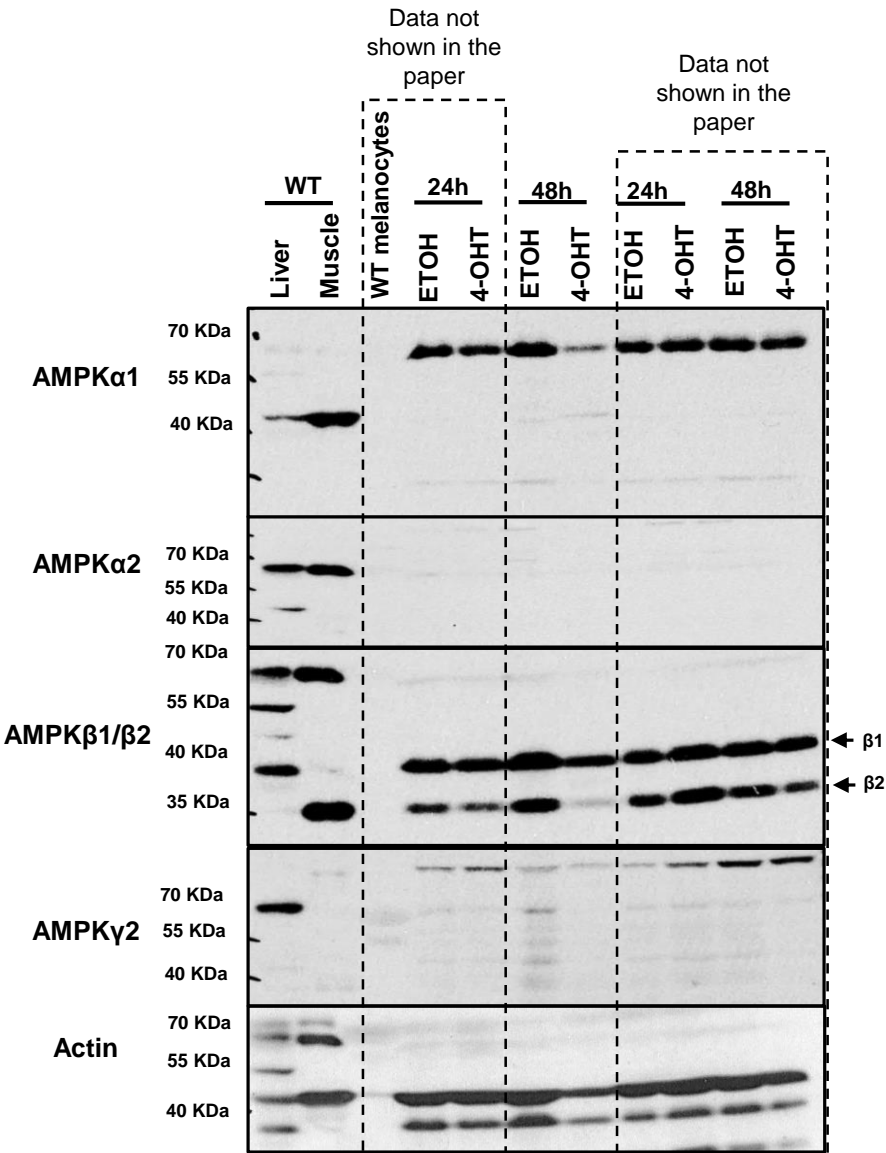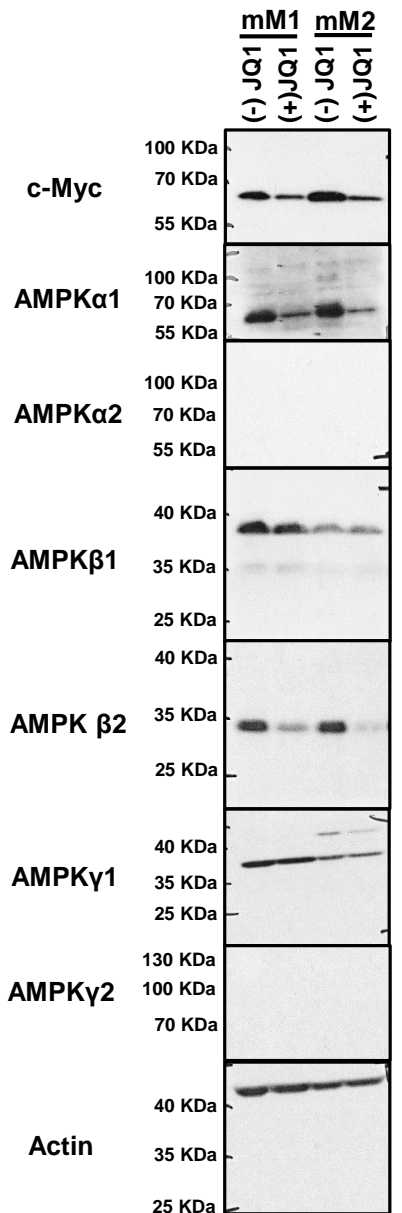

B)

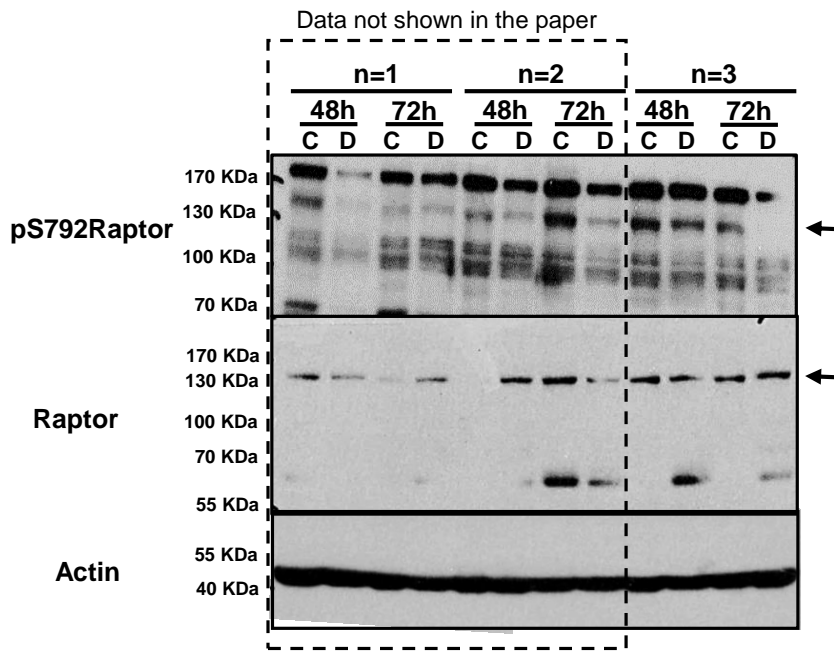

C)

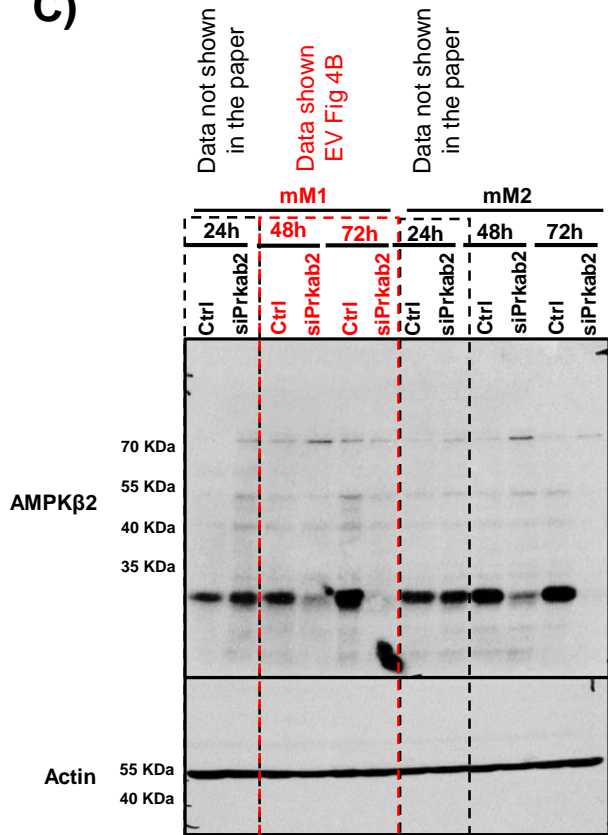

D)

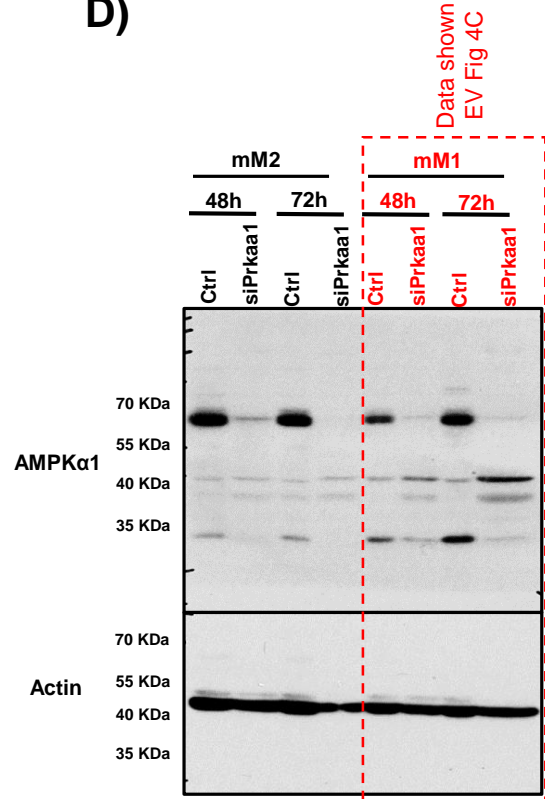

E)

Data not shown in the paper

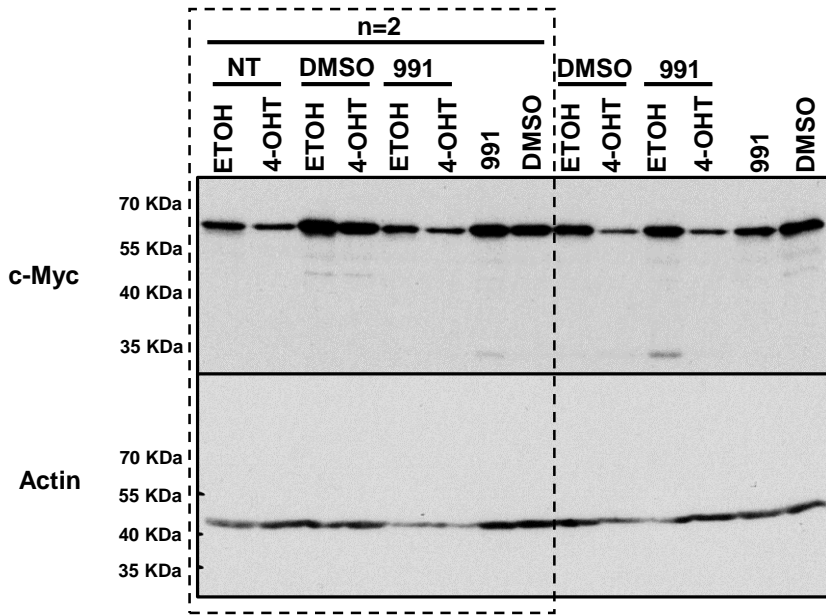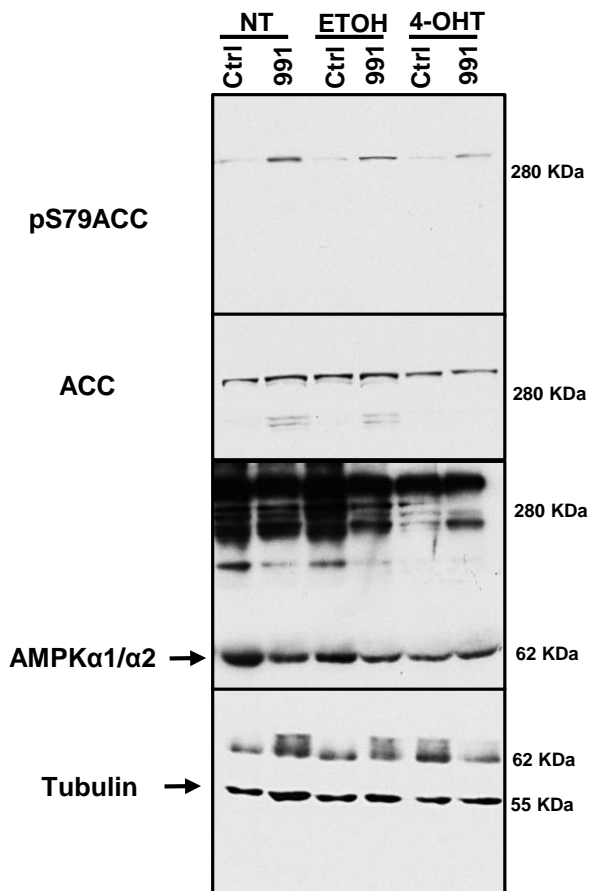

Supplement: EMBJ-37-e97673-s004.pdf [file EMBJ-37-e97673-s004.pdf]

A)

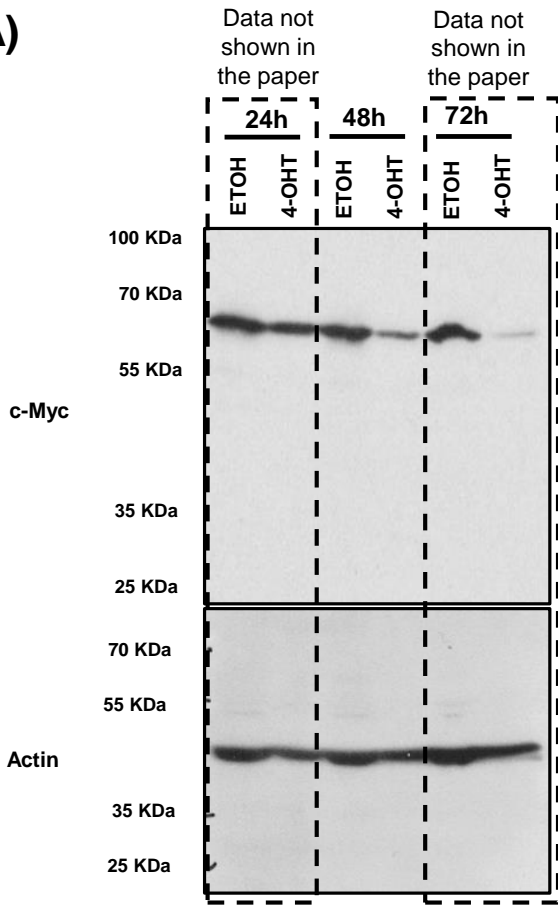

B)

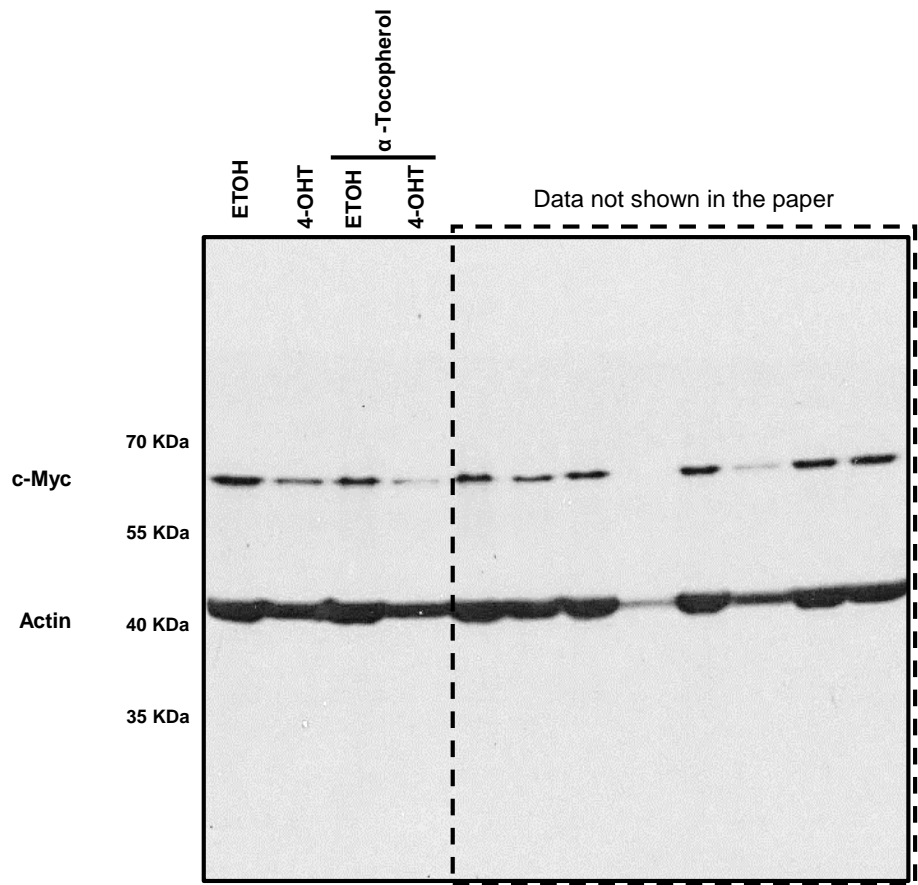

Supplement: EMBJ-37-e97673-s005.pdf [file EMBJ-37-e97673-s005.pdf]

A)

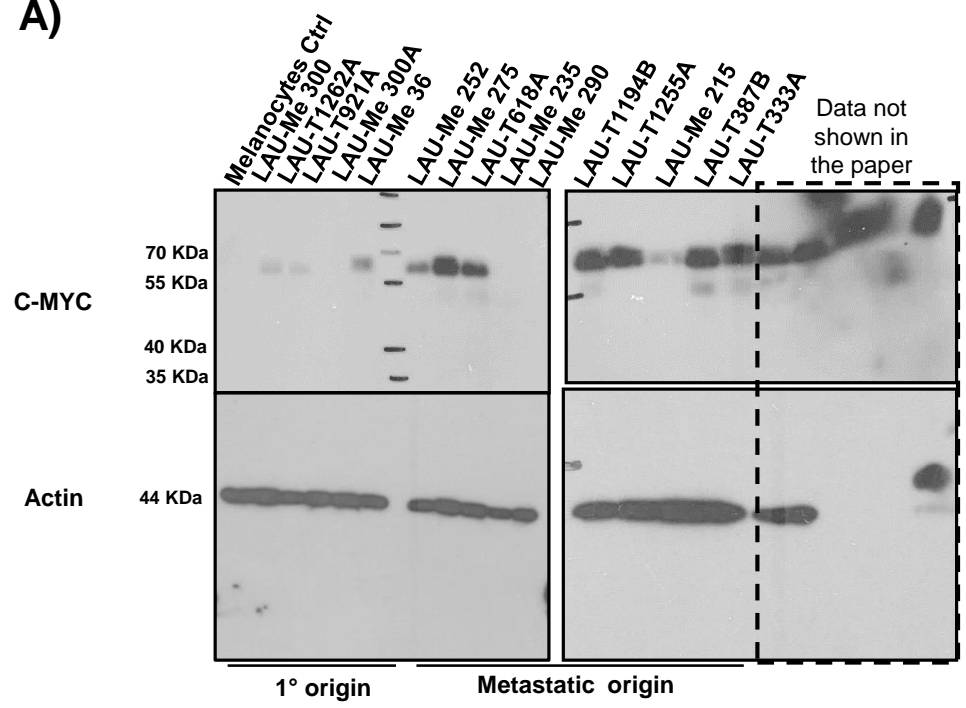

B)

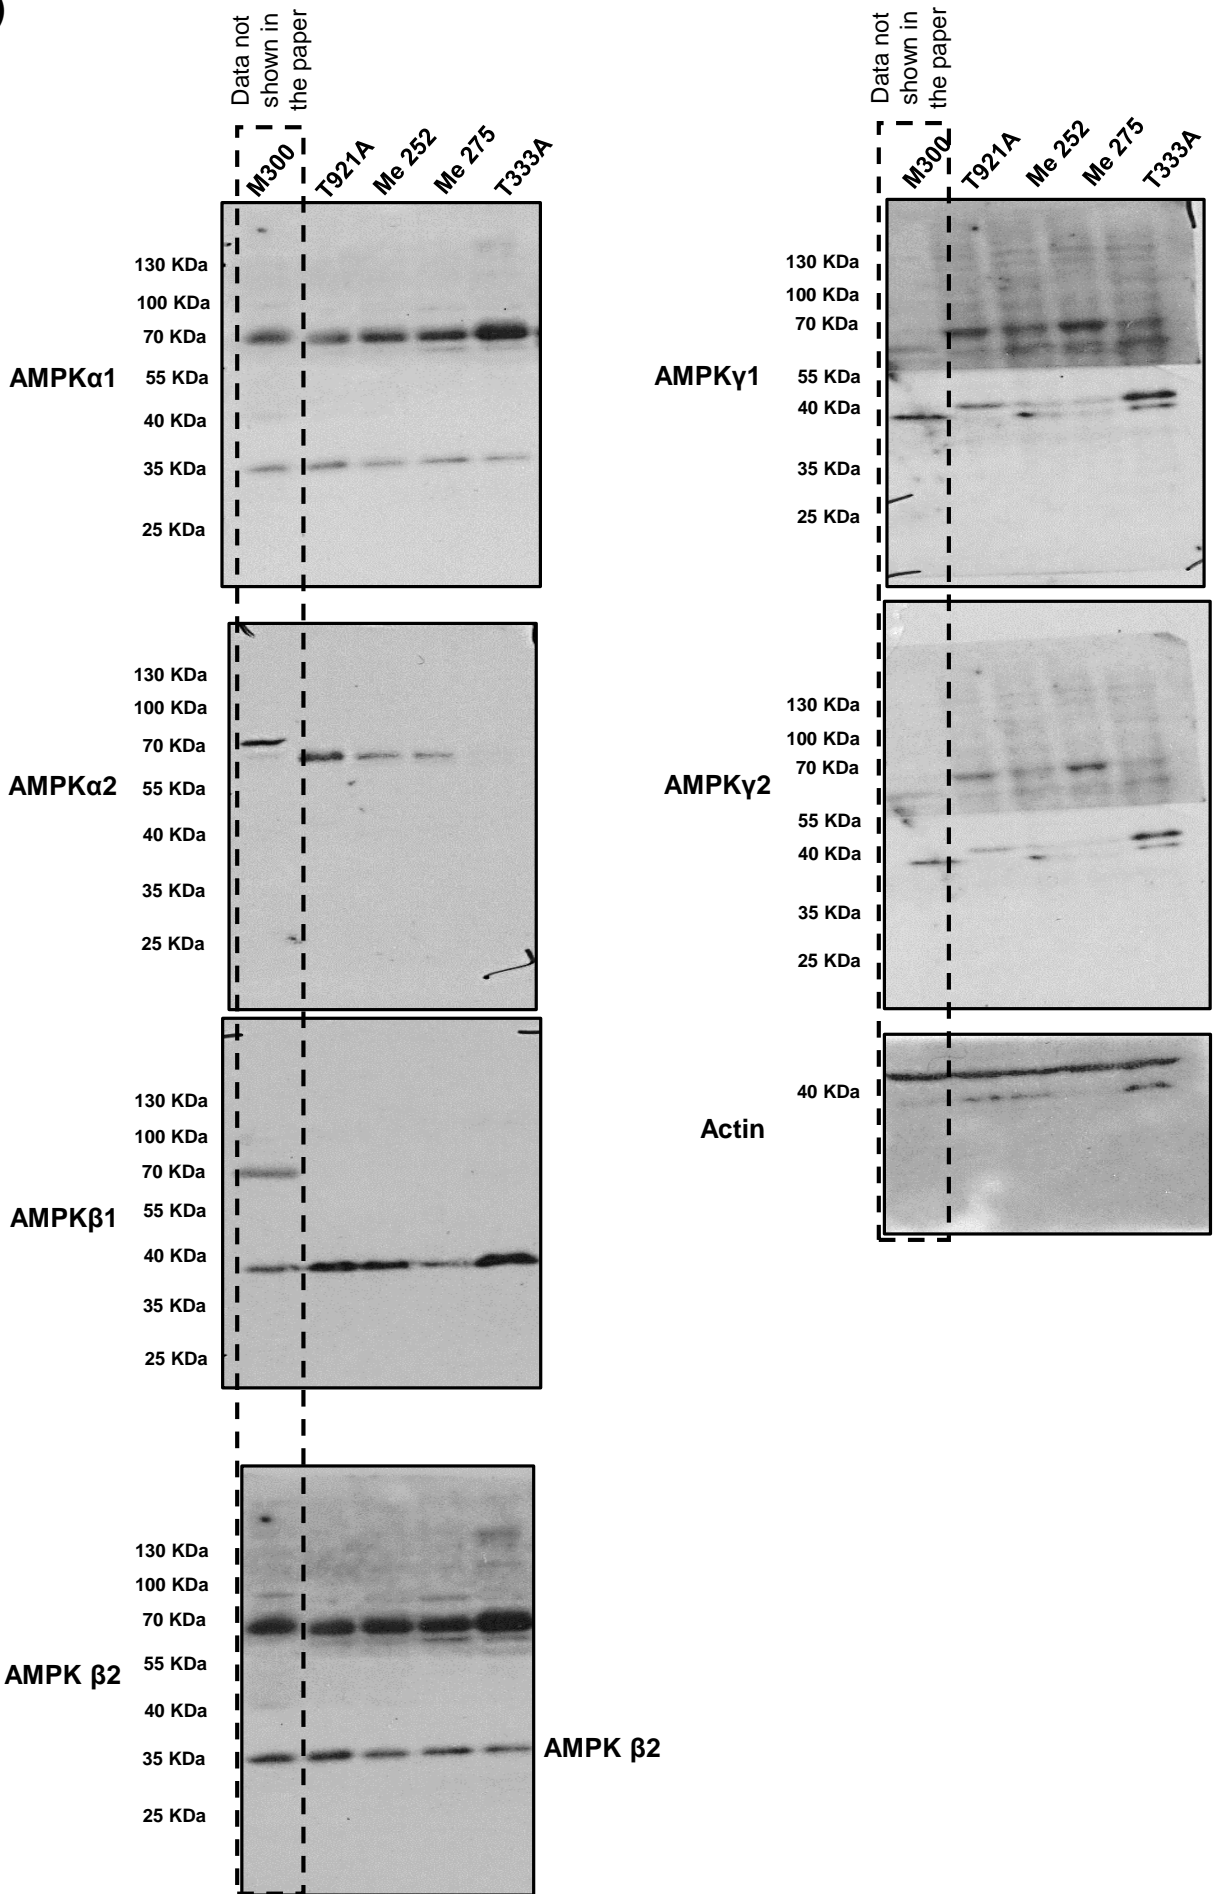

Supplement: EMBJ-37-e97673-s006.pdf [file EMBJ-37-e97673-s006.pdf]
